# Supplementary material for: Complete Mitogenome of a Leaf-Mining Buprestid Beetle, Trachys auricollis, and Its Phylogenetic Implications
Source: PubMed Central journal article supplement (PMC6947639; doi:10.3390/genes10120992), 2019-12-01
Supplement: genes-10-00992-s001.pdf [file genes-10-00992-s001.pdf]

**Table S1.** Length, A + T content (%), AT skew, and GC skew for *T. auricollis* and *T. troglodytiformis*.

| Region | <i>Trachys Auricollis</i> |           |         |         | <i>Trachys Troglodytiformis</i> |           |         |         |
|--------|---------------------------|-----------|---------|---------|---------------------------------|-----------|---------|---------|
|        | Length (bp)               | A + T (%) | AT Skew | GC Skew | Length (bp)                     | A + T (%) | AT Skew | GC Skew |
| genome | 16429                     | 71.1      | 0.10    | -0.20   | 16316                           | 74.6      | 0.10    | -0.19   |
| PCGs   | 11097                     | 69.4      | -0.14   | -0.02   | 11134                           | 73.0      | -0.14   | -0.02   |
| rrnl   | 1294                      | 76.8      | -0.15   | 0.31    | 1260                            | 79.2      | -0.13   | 0.32    |
| rrns   | 758                       | 75.2      | -0.07   | 0.27    | 757                             | 77.3      | -0.10   | 0.27    |
| CR     | 1847                      | 73.4      | 0.04    | -0.22   | 1728                            | 78.9      | 0.16    | -0.26   |
| tRNA   | 1444                      | 73.4      | 0.02    | 0.11    | 1450                            | 76.0      | 0.01    | 0.12    |

AT skew = (A - T)/(A + T), GC skew = (G - C)/(G + C); CR = control region, also called the A + T-rich region.

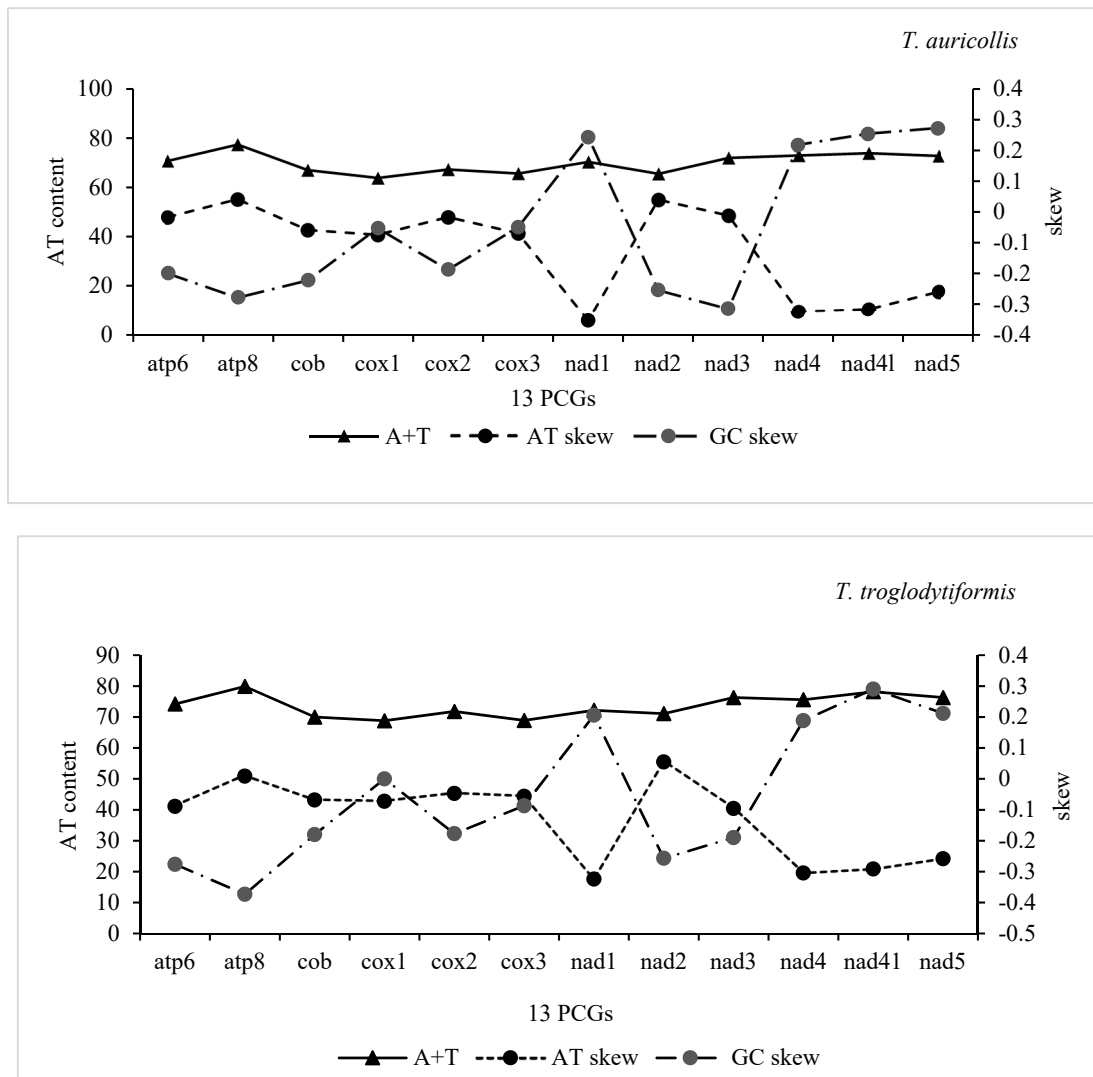

**Figure S1.** The base composition of protein-coding genes and two rRNAs in the mitochondrial genomes of *T. auricollis* and *T. troglodytiformis*.

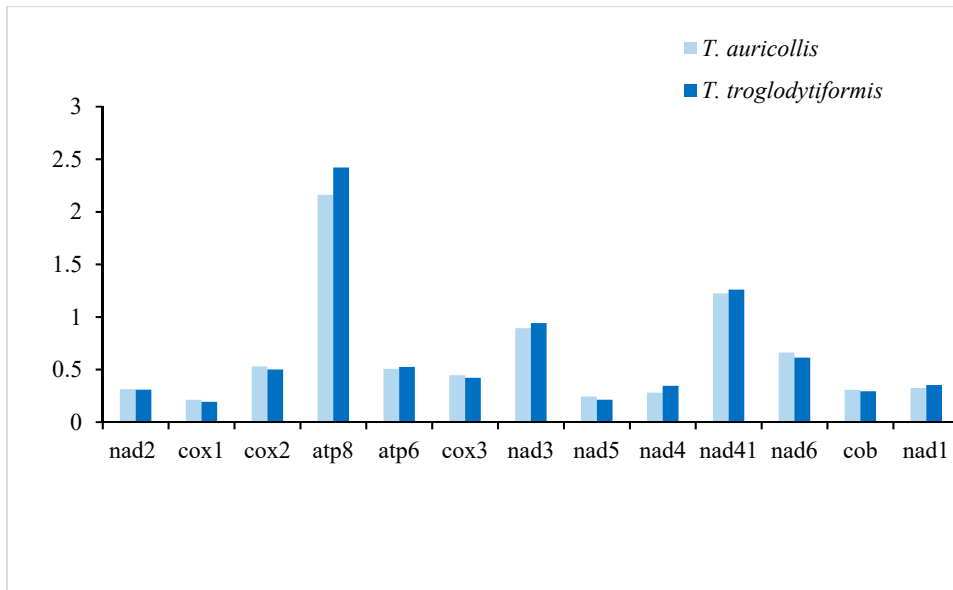

**Figure S2.** Ka/Ks ratios of 13 protein-coding genes. Ka is the nonsynonymous substitution rate, and Ks is the synonymous substitution rate.

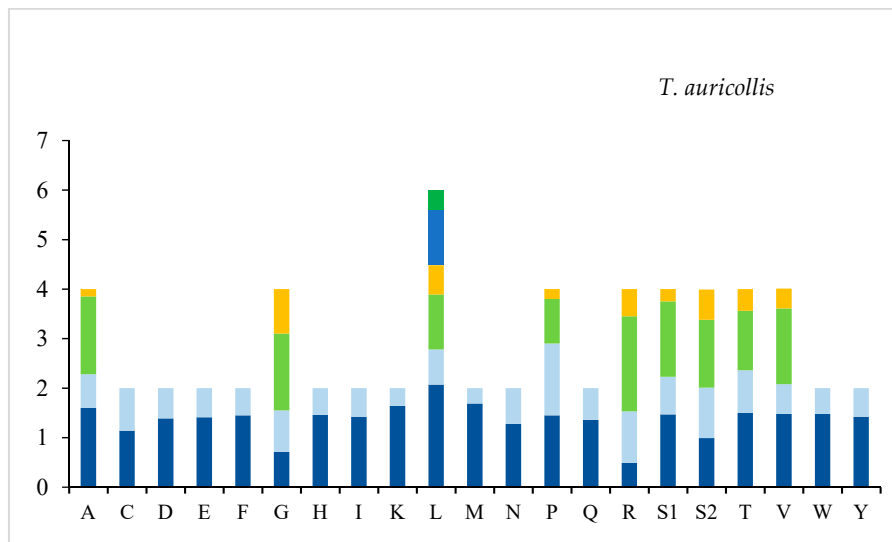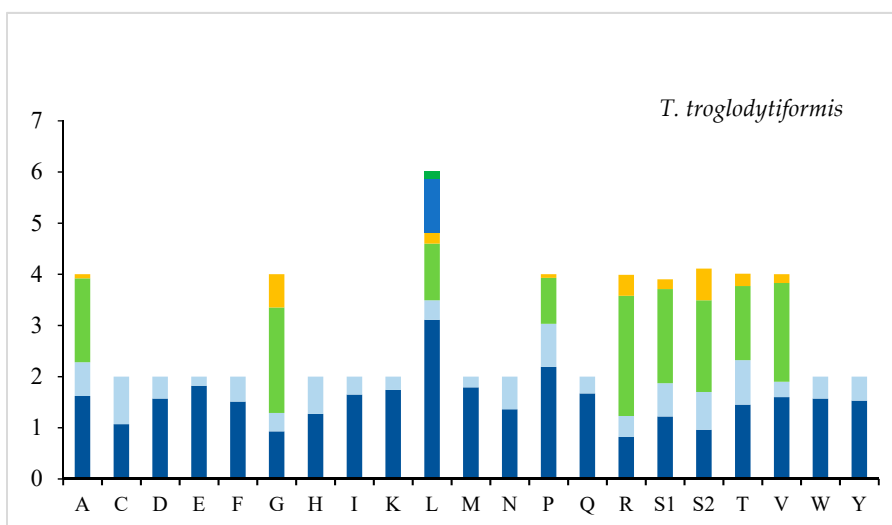

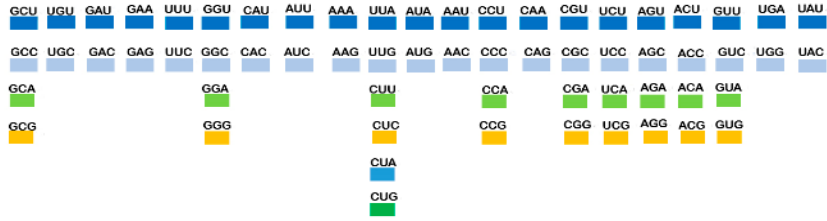

**Figure s3.** Relative synonymous codon usage (RSCU) for protein-coding genes of *T. auricollis* and *T. troglodytiformis* mitochondrial genomes. Codon families are provided on the x-axis.

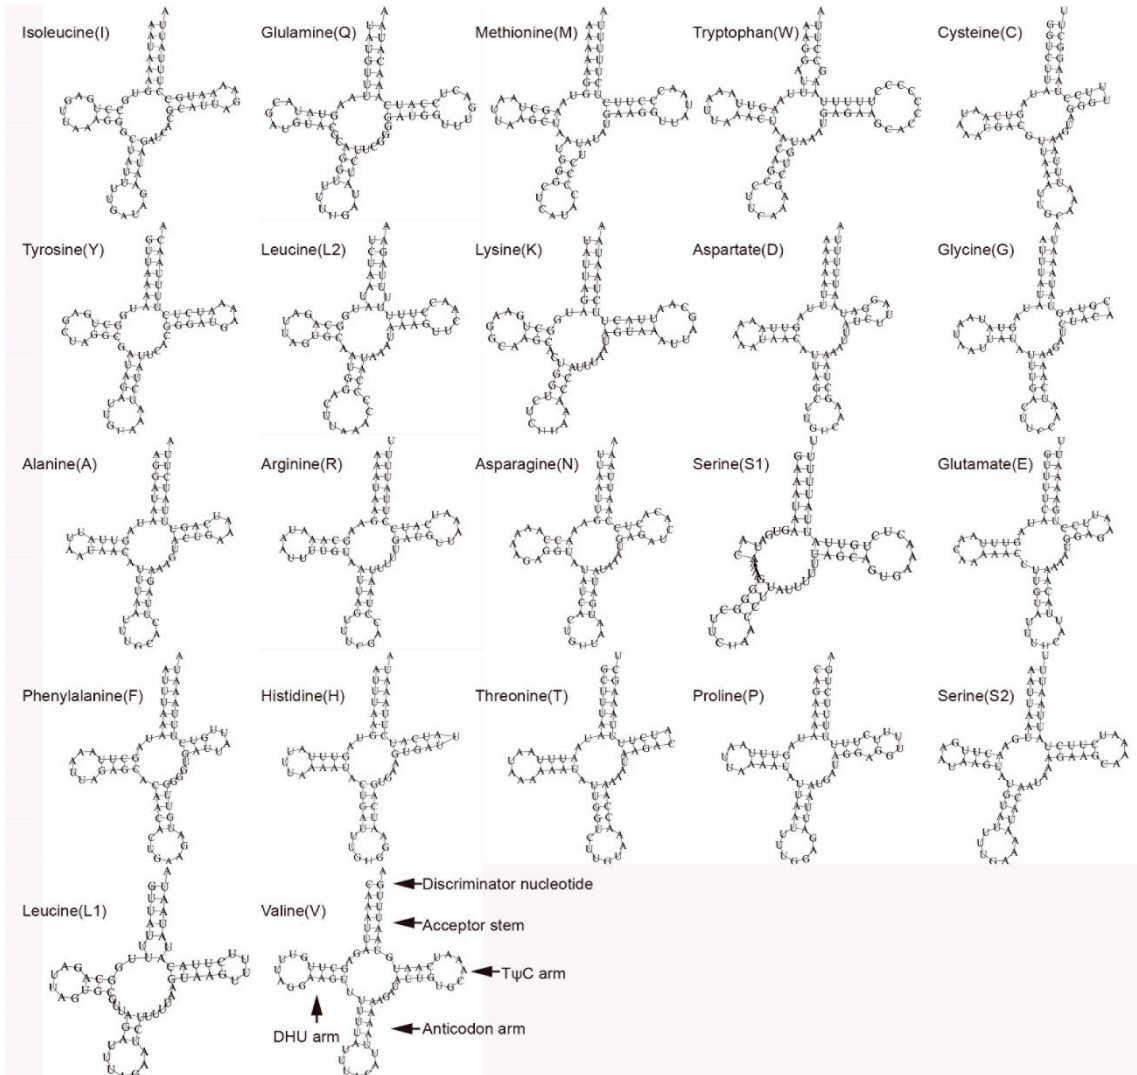

**Figure S4.** Predicted secondary structures of the 22 typical tRNA genes of the *T. auricollis* mitochondrial genome.

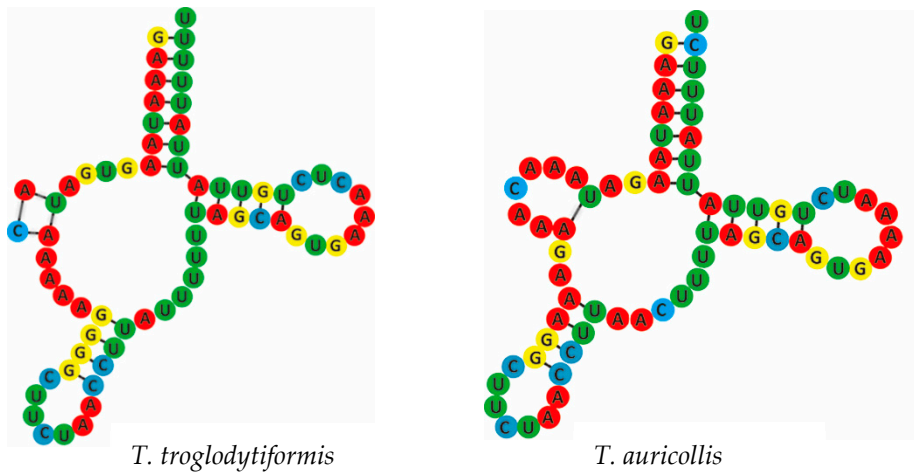

**Figure S5.** Predicted secondary cloverleaf structure for the *trnS1* genes of *T. auricollis* and *T. troglodytiformis*. Nucleotide sequences from 5' to 3' are indicated for *trnS1*, Watson-Crick base-pairing, and G-U base-pairing. The arms of tRNAs (clockwise from top) are the amino acid acceptor (AA) arm, TΨC (T) arm, the anticodon (AC) arm, and the dihydrouridine (DHU) arm.

*T. auricollis* - G T T A A G T T A G A C T T A T T A A C A A - - - T T T G  
*T. troglodytiformis* A A A C A A G T T T A A A A T A A C A A C A A A G A T T T A

*T. auricollis* T C T A T T T T T T G T T A C T A A A A T T T A T T A A C G A  
*T. troglodytiformis* A A T A T T T A T A T T A C T A A A T T T T A T T A A C G A

*T. auricollis* T A A A G A T A T T G T G T T A A T G A C T A A T A A A C A  
*T. troglodytiformis* T A A T T A A A A G G T T A A A C C A A A T A A T A A A - G

*T. auricollis* T A G C C C T G A C A G C T A A A G T A A G A T T T T C G A  
*T. troglodytiformis* T G A C C C T C C C T G G T A A A A C A A - - - C C T A G A

*T. auricollis* T G A C A G C T A A A G T A A G A T T T T C G A C T C T A G  
*T. troglodytiformis* - A A C A A C C A G G G A A - - - - C C T G A C - C T C C

*T. auricollis* C T A A A G T A A G A T T T T C G A C T C T A G C T A G C T  
*T. troglodytiformis* C C C T G G T A A A A A - - - - - C A A C C T A G A A

*T. auricollis* T A A G A T T T T C G A C T C T A G C T A G C T A A T C C C  
*T. troglodytiformis* T A A - - - C C T A G A A A C - A A C T A G G G A A - - C C

*T. auricollis* T T T C G A C T C T A G C T A G C T A A T C C C T G A T A G  
*T. troglodytiformis* G T C A G A A T G A A C C T T A A A A A C C C C T T - T A A

*T. auricollis* C T C T A G C T A G C T A A T C C C T A A T A G A T T A A C  
*T. troglodytiformis* C - - - - - - - - - - A T C C C T C T T C A A A A C C A A

*T. auricollis* C C C A A A C T C G C A G G T T T C A C C C C C C A A A A A  
*T. troglodytiformis* T T A A A A A T T - - - - - T T T T T T T T T G C A A A A A

*T. auricollis* A A T T T T T G A T T T T T A A A A A T A A C G A T A A T C  
*T. troglodytiformis* A A C C A A A T A A A A A A A A A A A A C A A - A A T T

*T. auricollis* T T T T T T C C T C C A A A G A A T T T A T T C G G A A A A  
*T. troglodytiformis* T T T T T T T T T A T A A A A A A A T - - A A T T A A A A A

*T. auricollis* A A A G C C C T A C C T T A C T A G G G C T T T C T C G T T  
*T. troglodytiformis* A A T T A C C A A A A T A A C T G A A G A A A A A C C G T T

*T. auricollis* T A G T C G C A A T T C T A T A C A A A A A G A A G A T T  
*T. troglodytiformis* T A A C G A C T T T C G T T C T C A C A C T A A A A A A T A

*T. auricollis* G T C T G A T T T A A G T T C A A A A A A A A T T T T T T A  
*T. troglodytiformis* T C T T G T T T C A A G T T T G G G A A A A T A T T T T T T

*T. auricollis* T T A A T A A T T T G T T T A C T A A A T T T A G T T A A C  
*T. troglodytiformis* A T A - T C T T T T A T T T A C T A A A A T T A G T T A A C

*T. auricollis* A T A C A T A T T T T T T T T T T T T T T T - - - - C T  
*T. troglodytiformis* A G A C A T A T T T T T T T T T T T T T T T T T T T T T T T C T

*T. auricollis* A A T T A T A A A C A A A T T A G A A G G A T A A A T T T  
*T. troglodytiformis* A A T T A T A T A T T A A T T A A A A G A A T A A A T T T

*T. auricollis* A T A T A T T A A A A T G T T T A T A T A T A T A T T T A A  
*T. troglodytiformis* A T G A A T T A A A A T A T C T T A T A T A T A T A T A T A A

*T. auricollis* A C G A T A C G G A T T T A T A A A G T A T T C T A A T A T  
*T. troglodytiformis* A C G A T A A G G A T C C A C T A A T A T T A A G A A T A T

*T. auricollis* A A T A A A C G A T G T T A C A T A G A G T T A A A T A T A  
*T. troglodytiformis* A A T A A A A T A T G T T A A A T A A G G T A A A A T A T A

*T. auricollis* C C C C C C C T A A A A A T T A G C T T C T C C G T T T T C  
*T. troglodytiformis* C C C A T T T T T A A A A C T A C T A A A A G T A T T T T T

*T. auricollis* T G C T - C G T T T A T A A A G G G A C T T T T T A T C A G  
*T. troglodytiformis* C C T T G C A G A T A G A A A A C G C C T T T T A A A C A G

*T. auricollis* T A G C T A T A T A T T C A T T T T A A A A T T G G T T A G  
*T. troglodytiformis* T T A A T A - A C A A A A A A T A T A A C A T - A A A T A T

*T. auricollis* A  
*T. troglodytiformis* -

**Figure S6.** Alignment of the conserved structural elements of the control regions (CRs) of *T. auricollis* and *T. troglodytiformis*. Sequence identity among species is indicated by yellow color.

*T. auricollis*

AAAAACCTAAAATGTAAATAACCAACAATAAATTAGCTTTAATCTTACGTAGCCCTGACAGCTAA  
AGTAAGATTTTCGACTCTAGCTAGCTAATCCCTGACAGATTAGCTTTAATCATACGTAGCCCTGA  
CAGCTAAAGTAAGATTTTCGACTCTAGCTAGCTAATCCCTGACAGATTAGCTTTAATCATACGTA  
GCCCTGACAGCTAAAGTAAGATTTTCGACTCTAGCTAGCTAATCCCTGACAGATTAGCTTTAATC  
TTACGTAGCCCTGACAGCTAAAGTAAGATTTTCGACTCTAGCTAGCTAATCCCTGACAGATTAGC  
TTAATCATACGTAGCCCTGACAGCTAAAGTAAGATTTTCGACTCTAGCTAGCTAATCCCTGATA  
GATTAGCTTTAATCTTACGTAGCCCTGACAACCTAAAGTAAGATTTTCGACTCTAGCTAGCTAATC  
CCTAATAGATTAACCTTTAAACGAAAAATAATAGGGAGAATAAGATTCCCACTTAAAATAACC  
CAAACCTCGCAGGTTTCACCCCCAAAAATCTCAAAAAAT Position(14,795-14,865)

*T. troglodytiformis*

ATACAGGAATTATTAACAACCAGGGAACCTGACCTCCCTGGTAAAAACAACCTAGAAACAAC  
CAGGGAACCTGACCTCCCTGGTAAAAACAACCTAGAAACAACCAGGGAACCTGACCTCCCTGG  
TAAAAACAACCTAGAAACAACCAGGGAACCTGACCTCCCTGGTAAAAACAACCTAGAAACAAC  
CAGGGAACCTGACCTCCCTGGTAAAAATAACCTAGAAACAACCTAGGGAACCTAACTATTAATT  
AAAAATATTAATAATAAATGTCAGAATGAACCTTAAAAACCCCTTTAAATCAACCAGAAATAA  
AAGAAATCATAAACCAAAAAATCTGACATCCTCTTCAAACCAAAATTGAGTAAACACAAAAGA  
CCTAAAAAAAAAATTTTCCAAAATTTTAAAAATTTTTTTTTTTTGCAAAAAAAAAAATTTTTTTTTTTT  
AAAAATTCATTAATAAACCAATAAAAAAAAAAAAAAAAAACAAAATT Position(15,861-15,902)

**Figure S7.** Partial A + T-rich regions of *T. auricollis* and *T. troglodytiformis*. The underlined sequences are perfectly repeated sequences in the A + T-rich region. The position refers to the length of the first repeated sequence.
